# Supplementary material
Source: Research Square preprint supplement (doi:10.21203/rs.3.rs-10129455/v1)
Supplement: Supplementary file 1 [file 88ac1ee5f890f9048f43425f.docx]

# STROBE checklist

*Manuscript: “Omitting axillary lymph node dissection for sentinel-node macrometastases in a resource-limited region: a single-centre study.”*

Reporting follows the STROBE statement for observational (cross-sectional/cohort) studies. Page numbers should be inserted to match the final typeset manuscript.

| **Item** | **STROBE recommendation (observational study)** | **Reported in** |
| --- | --- | --- |
| Title & abstract (1) | Study design in title/abstract; structured summary | Title; Abstract |
| Background/rationale (2) | Scientific background and rationale | Introduction |
| Objectives (3) | Specific objectives | Introduction (final paragraph) |
| Study design (4) | Key elements of design | Patients and Methods – Study design and cohorts |
| Setting (5) | Setting, locations, relevant dates | Patients and Methods – Setting; Study design and cohorts |
| Participants (6) | Eligibility criteria, sources, selection | Patients and Methods – Study design and cohorts |
| Variables (7) | Outcomes, exposures, predictors, definitions | Patients and Methods – Data collection; Definitions |
| Data sources/measurement (8) | Sources and methods of assessment | Patients and Methods – Data collection |
| Bias (9) | Efforts to address potential bias | Patients and Methods; Limitations |
| Study size (10) | How study size was arrived at | Patients and Methods – Study design and cohorts |
| Quantitative variables (11) | Handling of quantitative variables/groupings | Patients and Methods – Data collection; Statistical analysis |
| Statistical methods (12) | All statistical methods | Patients and Methods – Statistical analysis |
| Participants (13) | Numbers at each stage | Results; Tables 1, 3 |
| Descriptive data (14) | Characteristics of participants | Results; Tables 1, 3 |
| Outcome data (15) | Numbers of outcome events/summary measures | Results; Tables 2, 4, 5 |
| Main results (16) | Estimates and, where relevant, precision | Results (descriptive; no multivariable model fitted) |
| Other analyses (17) | Subgroups/interactions/sensitivity | Results (mastectomy vs BCS subgroups) |
| Key results (18) | Summarise key results with reference to objectives | Discussion (first paragraph) |
| Limitations (19) | Limitations, sources of bias | Discussion – Limitations |
| Interpretation (20) | Cautious overall interpretation | Discussion; Conclusion |
| Generalisability (21) | External validity | Discussion – Limitations; Conclusion |
| Funding (22) | Source of funding/role of funders | Declarations – Funding |
